# Supplementary material for: Reductive formation of palladium nanoparticles by Shewanella oneidensis: role of outer membrane cytochromes and hydrogenases
Source: Royal Society of Chemistry journal article supplement (doi:10.1039/c3ra44143a), 2013-01-01
Supplement: c3ra44143a.pdf [file c3ra44143a.pdf]

## Electronic Supplementary Information

### **Reductive Formation of Palladium Nanoparticles by *Shewanella oneidensis*: Role of Outer Membrane Cytochromes and Hydrogenases**

Chun Kiat Ng,<sup>a,b</sup> Tian Kou Cai Tan,<sup>a,c</sup> Hao Song<sup>a,d</sup> and Bin Cao<sup>\*a,e</sup>

<sup>a</sup>Singapore Centre on Environmental Life Sciences Engineering, Nanyang Technological University, Singapore 637551. Fax: +65 6316 7349; Tel: +65 6790 5277; E-mail: bincao@ntu.edu.sg

<sup>b</sup>Interdisciplinary Graduate School, Nanyang Technological University, Singapore

<sup>c</sup>School of Chemical and Life Sciences, Singapore Polytechnic, Singapore

<sup>d</sup>School of Chemical and Biomedical Engineering, Nanyang Technological University, Singapore

<sup>e</sup>School of Civil and Environmental Engineering, Nanyang Technological University, Singapore

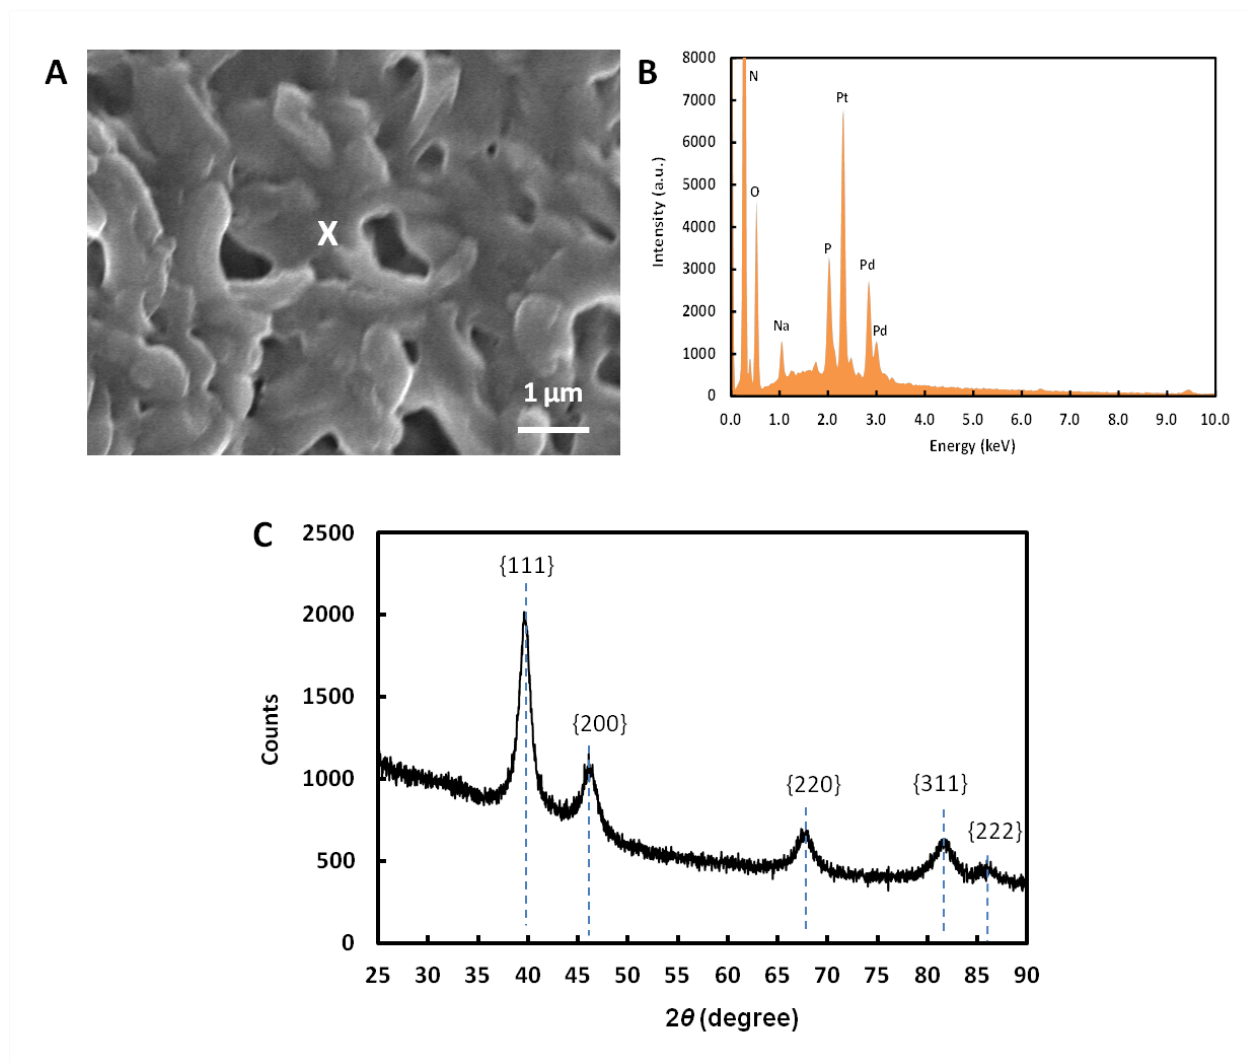

**Fig. S1.** (A) SEM image, (B) EDX spectrum, and (C) a representative XRD spectrum of *S. oneidensis* cells with Pd(0) nanoparticles.

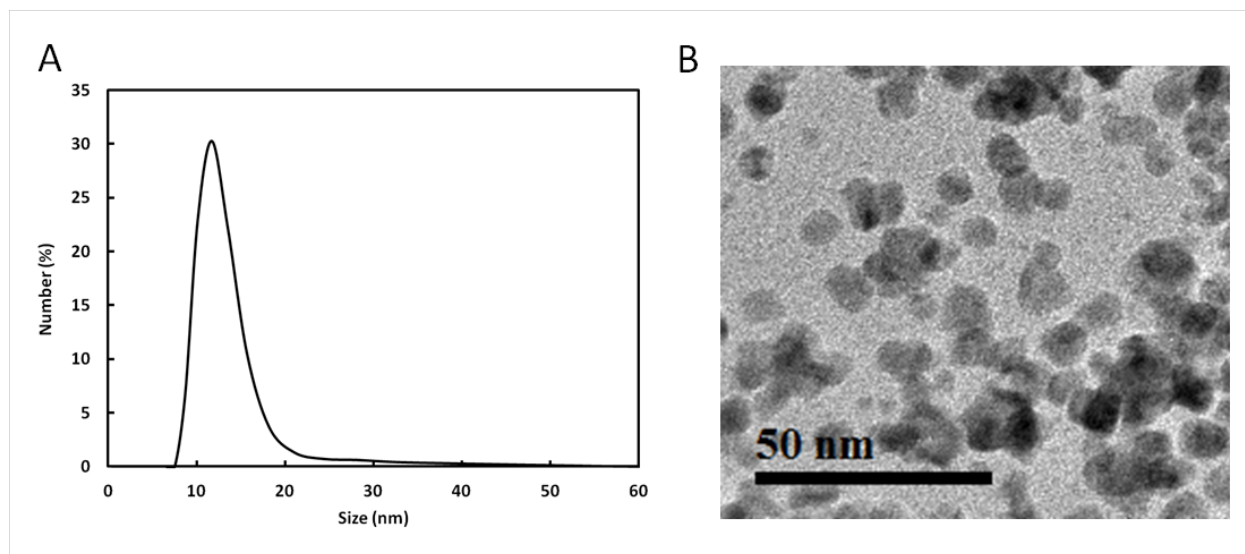

**Fig. S2.** (A) Particle size distribution and (B) TEM image of the extracellular Pd(0) nanoparticles produced by *S. oneidensis* MR-1.
